# Supplementary material for: Synthesis of long TiO2 nanotube arrays with a small diameter for efficient dye-sensitized solar cells
Source: Royal Society of Chemistry journal article supplement (doi:10.1039/c3ra40221e), 2013-01-01
Supplement: c3ra40221e.pdf [file c3ra40221e.pdf]

## **Supporting Information**

### **Synthesis of long TiO<sub>2</sub> nanotube arrays with a small diameter for efficient dye-sensitized solar cells**

Xiaolin Liu, Jia Lin, and Xianfeng Chen\*

Department of Physics, The State Key Laboratory on Fiber Optic Local Area  
Communication Networks and Advanced Optical Communication Systems, Shanghai  
Jiao Tong University, 800 Dongchuan Road, Shanghai 200240, China

\* Correspondence: [xfchen@sjtu.edu.cn](mailto:xfchen@sjtu.edu.cn)

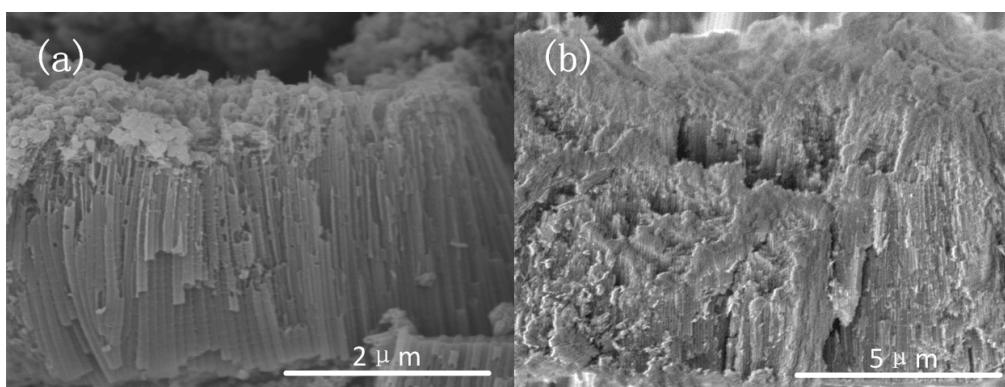

Fig. S11. Cross-sectional SEM images showing the TiO<sub>2</sub> nanotube arrays under 20 V and 60 °C, for the different reaction time: (a) 1 h and (b) 6 h.

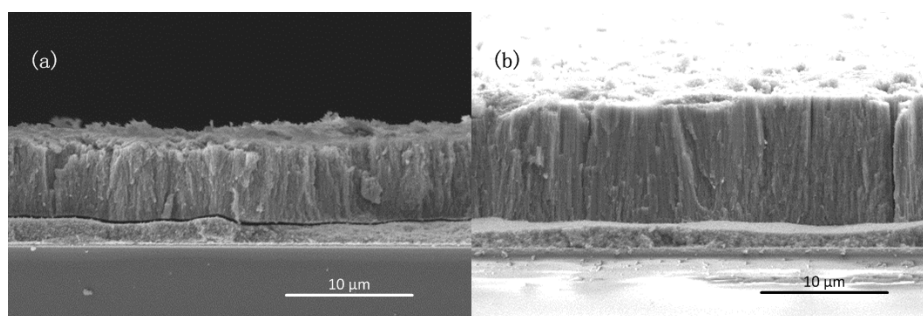

Fig. S12. Cross-sectional SEM images of the DSSCs' photoanodes with the approximately same TiO<sub>2</sub> nanoparticles layer thickness but different tube length: (a) 20V, 50 °C, for 4 h and (b) 20V, 50 °C, for 5 h.

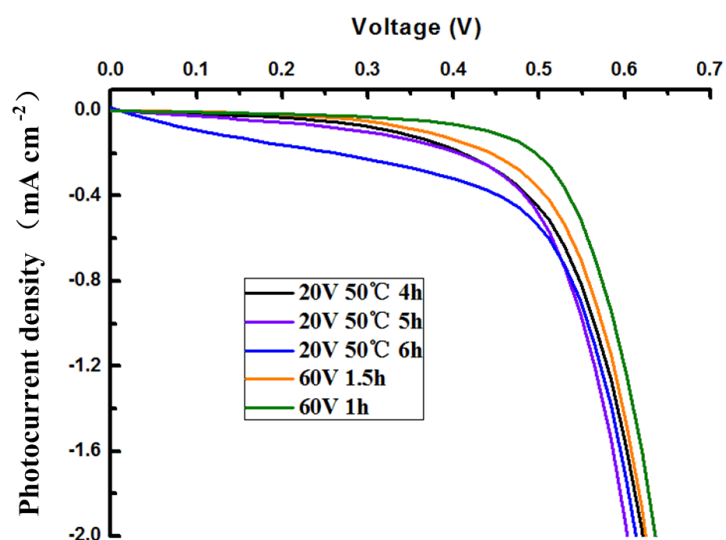

Fig. S13. The current density data of the DSSCs samples under no illumination.
